# Supplementary material for: Swiss University Students’ Attitudes toward Pharmacological Cognitive Enhancement
Source: PLoS One. 2015 Dec 10;10(12):e0144402. doi: 10.1371/journal.pone.0144402 (PMC4675521; doi:10.1371/journal.pone.0144402)
Supplement: S3 Table — (XLSX) [file pone.0144402.s004.xlsx]

## Sheet: Tabelle1
S3 Table. Students‘ attitudes toward pharmacological cognitive enhancement (PCE) in numbers and proportions
	Total (2,999)				PCE prior to the last exam (223)				PCE but not prior to the last exam (425)				Never used PCE (2,351)
	agree	unsure	disagree		agree	unsure	disagree		agree	unsure	disagree		agree	unsure	disagree
Acceptability of substances used while studying (assuming rather weak efficacy)	N=2,933				n=223				n=425				n=2,285
Coffee	2,220 (76)	467 (16)	247 (8)		178 (80)	27 (12)	18 (8)		339 (80)	53 (12)	33 (8)		1,703 (74)	387 (17)	196 (9)
Energy drinks	1,771 (60)	637 (22)	525 (18)		148 (66)	39 (17)	36 (16)		286 (67)	79 (19)	60 (14)		1,337 (59)	519 (23)	429 (19)
Caffeine tablets	1,134 (39)	812 (28)	987 (34)		130 (58)	39 (17)	54 (24)		193 (45)	124 (29)	108 (25)		811 (35)	649 (28)	825 (36)
Methylphenidate or modafinil as a prescribed medication	733 (25)	558 (19)	1,642 (56)		94 (42)	44 (20)	85 (38)		142 (33)	92 (22)	191 (45)		497 (22)	422 (18)	1,366 (60)
Methylphenidate or modafinil without a prescription	201 (7)	267 (9)	2,465 (84)		49 (22)	38 (17)	136 (61)		57 (13)	52 (12)	316 (74)		95 (4)	177 (8)	2,013 (88)
Illegal stimulants (amphetamine, cocaine, or MDMA)	94 (3)	187 (6)	2,652 (90)		24 (11)	36 (16)	163 (73)		22 (5)	44 (10)	359 (84)		48 (2)	107 (5)	2.130 (93)
Case example of a student using methylphenidate while studying	N=2,880				n=222				n=419				n=2,239
It is acceptable to use methylphenidate without a prescription	390 (14)	447 (16)	2,043 (71)		85 (38)	39 (18)	98 (44)		104 (25)	92 (22)	223 (53)		201 (9)	316 (14)	1,722 (77)
It is acceptable with a prescription even if no mental disorder has been diagnosed	563 (20)	552 (19)	1,765 (61)		84 (38)	35 (16)	103 (46)		124 (30)	92 (22)	203 (48)		355 (16)	425 (19)	1,459 (65)
It is acceptable with a prescription and with a diagnosed mental disorder	2,065 (72)	469 (16)	346 (12)		164 (74)	30 (14)	28 (13)		311 (74)	63 (15)	45 (11)		1,590 (71)	376 (17)	273 (12)
Contexts of PCE use (assuming hypothetically strong effects & availability)	N=2,772				n=209				n=392				n=2,171
PCE is fair if fellow students use effective substances	401 (14)	438 (16)	1,933 (70)		73 (35)	42 (20)	94 (45)		93 (24)	77 (20)	222 (56)		235 (11)	319 (15)	1,617 (74)
PCE is fair if fellow students have poor grades	465 (17)	435 (16)	1,871 (68)		83 (40)	42 (20)	84 (40)		110 (28)	63 (16)	219 (56)		272 (13)	330 (15)	1,568 (72)
PCE is fair if fellow students have a diagnosed mental disorder	1,771 (64)	605 (22)	394 (14)		156 (75)	31 (15)	22 (11)		274 (70)	67 (17)	51 (13)		1,341 (62)	507 (23)	321 (15)
PCE is fair if fellow students have a mental disorder but no diagnosis	732 (26)	629 (23)	1,409 (51)		102 (49)	35 (17)	72 (34)		147 (38)	84 (21)	161 (41)		483 (22)	510 (24)	1,176 (54)
PCE is fair if surgeons have long operations or night shifts	926 (33)	528 (19)	1,316 (48)		96 (46)	29 (14)	84 (40)		156 (40)	68 (17)	168 (43)		674 (31)	431 (20)	1,064 (49)
PCE is fair if professors improve their academic teaching skills/ learning	465 (17)	430 (16)	1,875 (68)		80 (38)	34 (16)	95 (46)		101 (26)	77 (20)	214 (54)		284 (13)	319 (15)	1,566 (72)
General attitudes toward PCE	N=2,601				n=195				n=366				n=2,040
PCE negatively alters the quality of the academic result	565 (22)	1,220 (46)	841 (32)		45 (23)	69 (35)	83 (42)		80 (22)	169 (45)	122 (33)		440 (21)	982 (48)	636 (31)
PCE changes feelings and social behaviour	1,609 (61)	788 (30)	230 (9)		123 (63)	50 (25)	24 (12)		233 (63)	108 (29)	30 (8)		1,253 (61)	630 (31)	176 (8)
PCE changes the personality	1,199 (46)	908 (34)	520 (20)		82 (42)	57 (29)	58 (29)		168 (45)	121 (33)	82 (22)		949 (46)	730 (35)	380 (19)
Results obtained with PCE are less worthy of recognition	1,786 (68)	385 (15)	456 (17)		95 (48)	27 (14)	75 (38)		205 (55)	62 (17)	104 (28)		1,486 (72)	296 (14)	277 (14)
Someone who needs PCE poorly planned his work	1,237 (47)	554 (21)	837 (32)		57 (29)	37 (19)	103 (52)		145 (39)	75 (20)	151 (41)		1,035 (50)	442 (22)	583 (28)
PCE hinders acquisition of planning and learning skills	1,599 (61)	528 (20)	501 (19)		89 (45)	34 (17)	74 (38)		145 (39)	75 (20)	151 (41)		1,318 (64)	409 (20)	333 (16)
Mankind always used substances to enhance performance, PCE is not new	670 (26)	486 (18)	1,472 (56)		91 (46)	35 (18)	71 (36)		139 (37)	60 (16)	172 (46)		440 (21)	391 (19)	1,229 (60)
PCE is generally unproblematic and acceptable	174 (7)	335 (13)	2,092 (80)		38 (19)	40 (21)	117 (60)		45 (12)	78 (21)	243 (67)		91 (4)	217 (11)	1,732 (85)
PCE is unproblematic as long as the substances are safe	520 (20)	479 (18)	1,602 (62)		75 (39)	28 (14)	92 (47)		113 (31)	77 (21)	176 (48)		332 (16)	374 (18)	1,334 (66)
PCE is unproblematic as long as the use occurs controlled and occasionally	691 (27)	543 (21)	1,367 (52)		90 (46)	29 (15)	76 (39)		155 (42)	76 (21)	135 (37)		446 (22)	438 (21)	1,156 (57)
PCE is unproblematic as long as it causes no harm to others	582 (22)	488 (19)	1,531 (59)		84 (43)	29 (15)	82 (42)		131 (36)	68 (18)	167 (46)		367 (18)	391 (19)	1,282 (63)
Comparison with doping in sports	N=2,561				n=191				n=357				n=2,013
PCE in academia is similar to doping in sports	1,634 (64)	369 (14)	558 (22)		92 (48)	29 (15)	70 (37)		186 (52)	53 (15)	118 (33)		1,356 (67)	287 (14)	370 (18)
In sports there are winners and loosers, PCE does not necessarily result in loosers	814 (32)	533 (21)	1,214 (47)		87 (46)	31 (16)	73 (38)		151 (42)	66 (19)	140 (39)		576 (28)	436 (22)	1,001 (50)
PCE is acceptable in a non-competitive environment with no relative ratings	1,085 (42)	579 (23)	897 (35)		113 (59)	33 (17)	45 (24)		178 (50)	76 (21)	103 (29)		794 (40)	470 (23)	749 (37)
PCE is acceptable in a competitive environment with relative ratings	198 (8)	308 (12)	2,055 (80)		44 (23)	36 (19)	111 (58)		51 (14)	59 (17)	247 (69)		103 (5)	213 (11)	1,697 (84)
Autonomy vs. Regulation	N=2,524				n=189				n=352				n=1,983
Everyone is free to decide whether to use drugs for PCE or not	1,464 (58)	401 (16)	659 (26)		127 (67)	32 (17)	30 (16)		235 (67)	42 (12)	75 (21)		1,102 (56)	327 (16)	554 (28)
I do not care if others use drugs for PCE while studying	959 (38)	542 (21)	1,023 (41)		104 (55)	34 (18)	51 (27)		167 (47)	77 (22)	108 (31)		688 (35)	431 (22)	864 (43)
The university should should regulate drug use for PCE	941 (37)	624 (25)	959 (38)		51 (27)	37 (20)	101 (53)		99 (28)	81 (23)	172 (49)		791 (40)	506 (25)	686 (35)
Not regulating PCE might result in unequal educational and professional perspectives	1,379 (55)	565 (22)	580 (23)		85 (45)	36 (19)	68 (36)		160 (46)	86 (24)	106 (30)		1,134 (57)	443 (22)	406 (21)
Non-regulated access to NE substances increases the pressure to use substances	1,210 (48)	471 (19)	843 (33)		81 (43)	31 (16)	77 (41)		171 (49)	64 (18)	117 (33)		958 (48)	376 (19)	649 (33)
Access to drugs is regulated sufficiently, specific PCE regulations are unnecessary	455 (18)	780 (31)	1,289 (51)		68 (36)	39 (21)	82 (43)		86 (24)	113 (32)	153 (44)		301 (15)	628 (32)	1'054 (53)
Duties of academic institutions	N=2,502				n=188				n=345				n=1,969
PCE use at universities may increase performance requirements	1,399 (56)	494 (20)	616 (24)		114 (61)	23 (12)	51 (27)		180 (52)	70 (20)	99 (28)		1,105 (56)	401 (20)	466 (24)
We should invesr more in research to develop effective substances for PCE	406 (16)	455 (18)	1,648 (66)		65 (35)	36 (19)	87 (46)		79 (23)	84 (24)	186 (53)		262 (13)	335 (17)	1,375 (70)
The university should collect data on prevalence and acceptance of PCE	1,613 (64)	616 (25)	280 (11)		123 (65)	37 (20)	28 (15)		221 (63)	87 (25)	41 (12)		1,269 (64)	492 (25)	211 (11)
The university should inform students about PCE and associated risks	1,917 (77)	386 (15)	206 (8)		146 (78)	22 (12)	20 (10)		279 (80)	45 (13)	25 (7)		1,492 (76)	319 (16)	161 (8)
I would use safe drugs for PCE even if I gained an advantage over others	404 (16)	331 (13)	1,767 (71)		90 (48)	30 (16)	68 (36)		106 (31)	54 (16)	185 (53)		208 (11)	247 (12)	1,514 (77)
PCE is a media-hype with no relevance to society	288 (12)	661 (26)	1,553 (62)		29 (15)	35 (19)	124 (66)		45 (13)	87 (25)	213 (62)		214 (11)	539 (27)	1,216 (62)
Values are numbers of students (%). Agree = strongly or rather agree, disagree = strongly or rather disagree. Bold numbers indicate strong directions of attitudes, meaning that at least half of the reference group agreed or disagreed.
